# Supplementary material for: MXene Anchored with Platinum Cobalt Alloy as an Efficient and Stable Electrocatalyst for Hydrogen Evolution
Source: Preprints.org preprint supplement (doi:10.20944/preprints202410.2222.v1), 2024-10-29
Supplement: Supplementary file 1 [file supplementary]

**Supporting information**


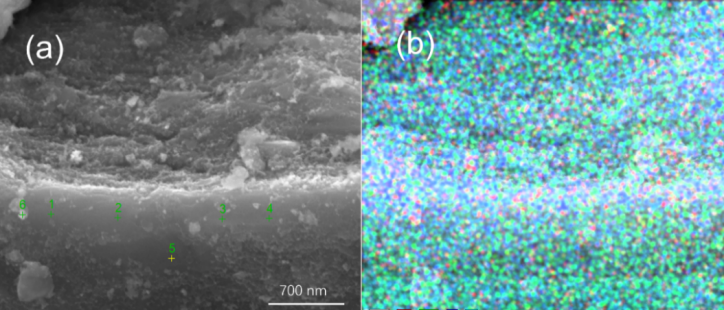


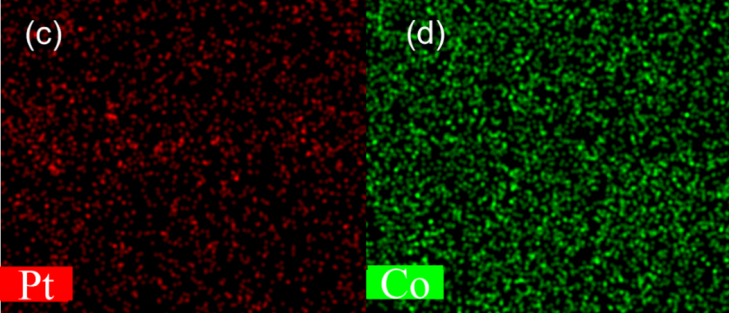


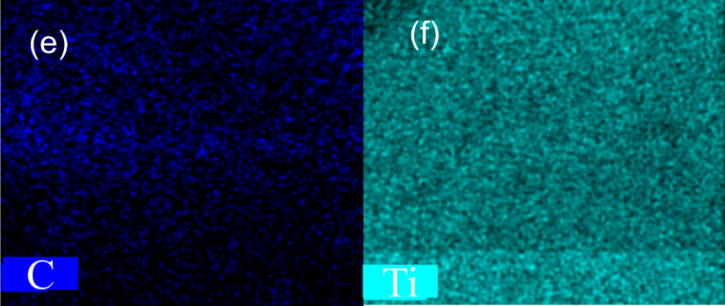


(g)


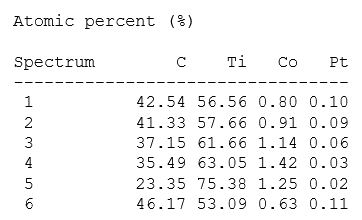


**Fig.S1.(a) SEM image of PtCo/Ti3C2Tx-32, (b) EDS mapping of PtCo/Ti3C2Tx-32, (c) Pt element, (d) Co element, (e) C element, (f) Ti element; (g) element proportion at each point in map**


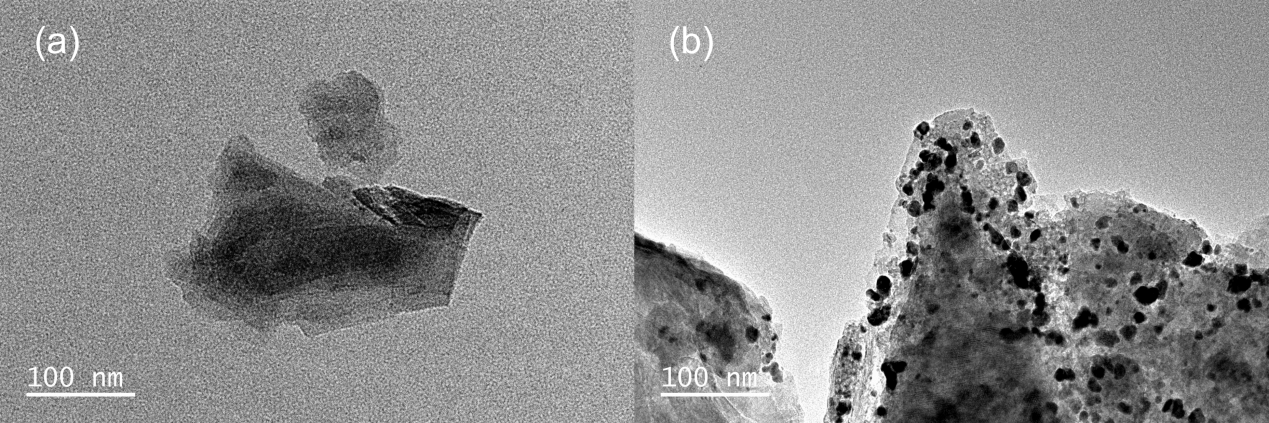


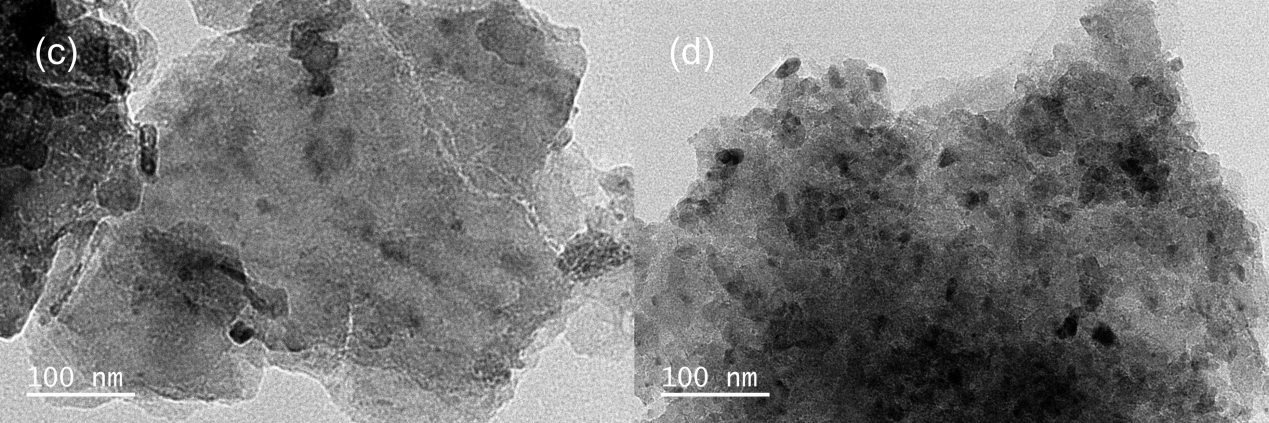


Fig.S2 TEM images of (a) Ti3C2Tx，(b) Co/Ti3C2Tx-32，(c) Pt/Ti3C2Tx-6.64，(d) PtCo/Ti3C2Tx-32

Fig.S3 XPS diagram of Ti3C2Tx

Fig.S4 XPS diagram of Co/Ti3C2Tx-32

Fig.S5 XPS diagram of Pt/Ti3C2Tx-6.64

Fig.S6 XPS diagram of PtCo/Ti3C2Tx-32


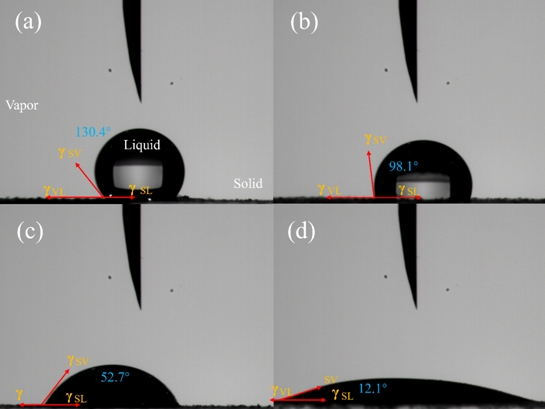


**Fig.S7 Contact angles of (a) Ti3C2T**x**，(b) Pt/Ti3C2Tx-6.64，(c) Co/Ti3C2Tx-32 and (d) PtCo/Ti3C2Tx-32**


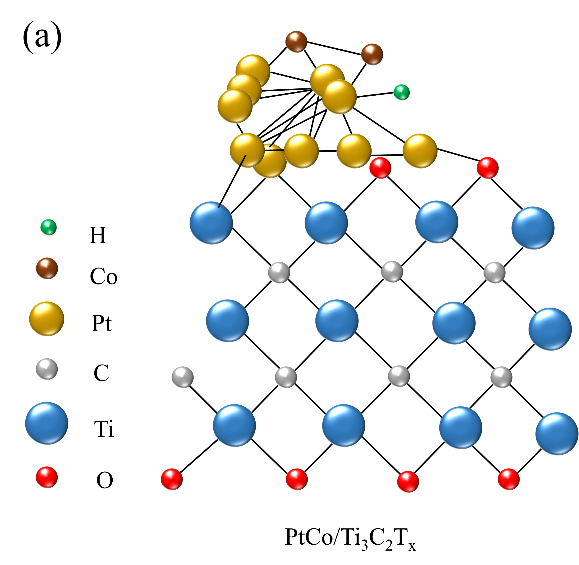

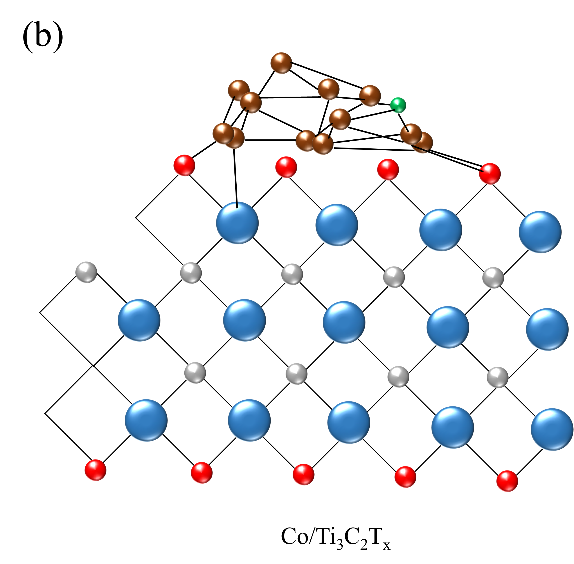


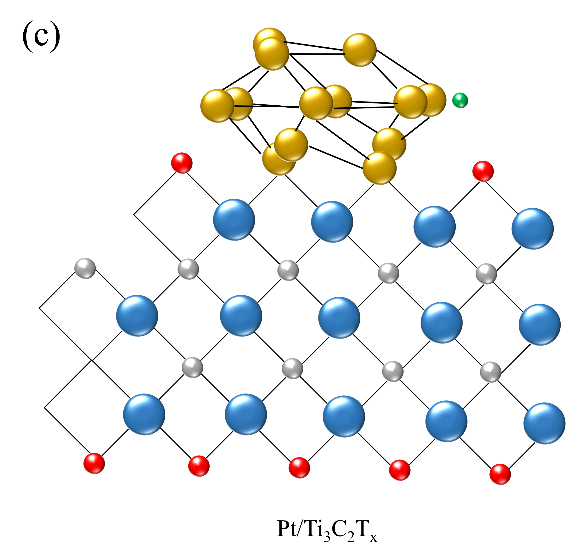


**Fig.S8 Schematic diagram of Co/Ti3C2Tx, Pt/Ti3C2Tx and PtCo/Ti3C2Tx models**

**Simulation structure of (a): PtCo/Ti3C2Tx, (b): Co/Ti3C2Tx, (c): Pt/Ti3C2Tx; (d): ΔGH* of Co/Ti3C2Tx, Pt/Ti3C2Tx and PtCo/Ti3C2Tx; PDOS diagram of Pt atoms on the surface of (e): PtCo alloy, (f): Pt; (g) d-band center diagram of Pt**
